# Supplementary material for: Whole-Genome Survey Analyses of Five Goby Species Provide Insights into Their Genetic Evolution and Invasion-Related Genes
Source: MDPI journal article supplement (doi:10.3390/ijms25063293), 2024-03-14
Supplement: s1 [file s1]

Table S1. The most frequent tetra-, Penta- and hexanucleotide repeats in different genomic sequence of 5 Gobiidae fish (Only the most frequent 10 motifs of different type are show here. The number of motifs is in parenthesis)

|       | <i>A. flavimanus</i> | <i>A. stigmethonius</i> | <i>F. gymnauchen</i> | <i>C. microcephalus</i> | <i>T. barbatus</i>   |
|-------|----------------------|-------------------------|----------------------|-------------------------|----------------------|
| Tetra | AAAT/ATTT (2351)     | AAAT/ATTT (2369)        | AATC/ATTG (4589)     | AAAT/ATTT (8542)        | AAAT/ATTT (3505)     |
|       | AATG/ATTC (1330)     | AATG/ATTC (1344)        | AAAT/ATTT (4144)     | AAAC/GTTT (2578)        | AAAC/GTTT (1582)     |
|       | ATCC/ATGG (1142)     | AGAT/ATCT (1107)        | AGAT/ATCT (3274)     | AATC/ATTG (1928)        | AATG/ATTC (1446)     |
|       | AGAT/ATCT (1060)     | ATCC/ATGG (976)         | ATCC/ATGG (1562)     | AAAG/CTTT (1650)        | AGAT/ATCT (1241)     |
|       | ACAT/ATGT (875)      | ACAT/ATGT (882)         | AAAC/GTTT (1313)     | AGAT/ATCT (1615)        | ATCC/ATGG (1198)     |
|       | ACGC/CGTG (850)      | ACGC/CGTG (851)         | AAGT/ACTT (1089)     | ACAT/ATGT (1363)        | ACGC/CGTG (1087)     |
|       | AAAC/GTTT (676)      | AAAG/CTTT (704)         | ACAT/ATGT (778)      | ATCC/ATGG (1350)        | AAAG/CTTT (992)      |
|       | AAAG/CTTT (482)      | AAAC/GTTT (672)         | AATG/ATTC (768)      | AATG/ATTC (1222)        | ACAT/ATGT (808)      |
|       | ACAG/CTGT (296)      | ACAG/CTGT (385)         | AAAG/CTTT (502)      | ACAG/CTGT (380)         | AAGG/CCTT (683)      |
|       | AAGT/ACTT (255)      | AATC/ATTG (226)         | ACAG/CTGT (354)      | AGGG/CCCT (366)         | AATC/ATTG (676)      |
| Penta | AAAAT/ATTTT (702)    | AAAAT/ATTTT (487)       | AAGAT/ATCTT (254)    | AAGAT/ATCTT (1198)      | AAAAT/ATTTT (399)    |
|       | AATTC/AATTG (366)    | AATTC/AATTG (438)       | AATAG/ATTCT (239)    | AAAAT/ATTTT (513)       | AATTC/AATTG (211)    |
|       | AATAT/ATAIT (305)    | AATAT/ATAIT (258)       | ACTAT/AGTAT (126)    | AATAT/ATAIT (446)       | AATAT/ATAIT (194)    |
|       | ACTAT/AGTAT (145)    | AAGGC/CCTTG (137)       | AAACT/AGTTT (112)    | AATAG/ATTCT (204)       | AAACT/AGTTT (172)    |
|       | AAATT/AATTT (137)    | AGATG/ATCTC (120)       | AATTC/AATTG (107)    | AAACT/AGTTT (180)       | AAATT/AATTT (132)    |
|       | AAGAT/ATCTT (104)    | AAGAT/ATCTT (107)       | AATAT/ATAIT (83)     | ACTAT/AGTAT (150)       | AAATC/ATTTG(125)     |
|       | AAACT/AGTTT (96)     | ACTAT/AGTAT (105)       | AAAAT/ATTTT (82)     | AAAC/GTTTT (146)        | ACTAT/AGTAT (121)    |
|       | AAGGC/CCTTG (67)     | AAATT/AATTT (91)        | AAGGC/CCTTG (82)     | AAATT/AATTT (138)       | AAGAT/ATCTT (93)     |
|       | AAAGT/ACTTT (61)     | AAACT/AGTTT (81)        | AATAC/ATTGT (78)     | AATCT/AGATT (89)        | AATAC/ATTGT (88)     |
|       | ACTCT/AGAGT (58)     | AATAC/ATTGT (55)        | AAATC/ATTTG (73)     | AGAGG/CCTCT (85)        | AAAC/GTTTT (81)      |
| Hexa  | AATCAG/ATTCTG (1294) | AATCAG/ATTCTG (1044)    | ACCAGG/CCTGGT (133)  | AACCCT/AGGGTT (94)      | ACCAGG/CCTGGT (442)  |
|       | AATGCT/AGCATT (362)  | AATGCT/AGCATT (365)     | ACCTGG/AGGTCC (62)   | ACCAGG/CCTGGT (67)      | ACCTGG/AGGTCC (207)  |
|       | ACCAGG/CCTGGT (359)  | ACCAGG/CCTGGT (269)     | AACCCT/AGGGTT (36)   | AATCAT/ATGATT (51)      | AATCAG/ATTCTG (154)  |
|       | AACCCT/AGGGTT (244)  | AACCCT/AGGGTT (155)     | ACTGCT/AGCAGT (27)   | AAAAAT/ATTTTT (46)      | AGATAT/ATATCT (113)  |
|       | ACACGC/CGTGTG (241)  | ACACGC/CGTGTG (146)     | AGATAT/ATATCT (22)   | AAGTCT/ACTTAG (42)      | AAATAT/ATAITTT (104) |
|       | AAAAAT/ATTTTT (208)  | AAAAAT/ATTTTT (143)     | AAGTCT/ACTTAG (21)   | AGATAT/ATATCT (32)      | AAAAAT/ATTTTT (102)  |
|       | ACCTGG/AGGTCC (92)   | ACCTGG/AGGTCC (87)      | AATCTG/AGATTC (21)   | AATACT/AGTATT (31)      | AACCCT/AGGGTT (98)   |
|       | AGATAT/ATATCT (76)   | ACTGCT/AGCAGT (55)      | AGCTCC/AGCTGG (20)   | AAGATT/AATCTT (30)      | AATGCT/AGCATT (84)   |
|       | AATCAT/ATGATT (62)   | AGATAT/ATATCT (54)      | AACCAG/CTGGIT (18)   | ACTGCT/AGCAGT (29)      | ACACGC/CGTGTG (83)   |
|       | ACTGCT/AGCAGT (62)   | AAATAT/ATAITTT (36)     | AATGCT/AGCATT (15)   | AAAATT/AATTTT (28)      | ACATAT/ATATGT (71)   |

Table S2. Ka/Ks of 13 protein-coding genes from 5 fish.

| Gene_name | Ka/Ks                   | <i>A. flavimanus</i> | <i>A. stigmatonhus</i> | <i>F. gymnauchen</i> | <i>C. microcephalus</i> | <i>T. barbatus</i> |
|-----------|-------------------------|----------------------|------------------------|----------------------|-------------------------|--------------------|
| COX1      | <i>A. flavimanus</i>    |                      |                        |                      |                         |                    |
|           | <i>A. stigmatonhus</i>  | 0.023267394          |                        |                      |                         |                    |
|           | <i>F. gymnauchen</i>    | 0.019969707          | 0.026790077            |                      |                         |                    |
|           | <i>C. microcephalus</i> | 0.030522551          | 0.032104725            | 0.034345371          |                         |                    |
|           | <i>T. barbatus</i>      | 0.02704615           | 0.030013127            | 0.022475565          | 0.0270889               |                    |
| COX2      | <i>A. flavimanus</i>    |                      |                        |                      |                         |                    |
|           | <i>A. stigmatonhus</i>  | 0.060606455          |                        |                      |                         |                    |
|           | <i>F. gymnauchen</i>    | 0.07265503           | 0.063022154            |                      |                         |                    |
|           | <i>C. microcephalus</i> | 0.045728394          | 0.056603772            | 0.028153836          |                         |                    |
|           | <i>T. barbatus</i>      | 0.063853972          | 0.057404121            | 0.02105691           | 0.030771063             |                    |
| COX3      | <i>A. flavimanus</i>    |                      |                        |                      |                         |                    |
|           | <i>A. stigmatonhus</i>  | 0.033830438          |                        |                      |                         |                    |
|           | <i>F. gymnauchen</i>    | 0.021139901          | 0.076781223            |                      |                         |                    |
|           | <i>C. microcephalus</i> | 0.059251483          | 0.050002446            | 0.035756256          |                         |                    |
|           | <i>T. barbatus</i>      | 0.052739352          | 0.052165389            | 0.037136786          | 0.062822879             |                    |
| CYTB      | <i>A. flavimanus</i>    |                      |                        |                      |                         |                    |
|           | <i>A. stigmatonhus</i>  | 0.025686321          |                        |                      |                         |                    |
|           | <i>F. gymnauchen</i>    | 0.036689369          | 0.038418619            |                      |                         |                    |
|           | <i>C. microcephalus</i> | 0.061464298          | 0.054628561            | 0.052300792          |                         |                    |
|           | <i>T. barbatus</i>      | 0.057564782          | 0.042613161            | 0.036627495          | 0.048154799             |                    |
| ND1       | <i>A. flavimanus</i>    |                      |                        |                      |                         |                    |
|           | <i>A. stigmatonhus</i>  | 0.02776181           |                        |                      |                         |                    |
|           | <i>F. gymnauchen</i>    | 0.042805135          | 0.056486778            |                      |                         |                    |
|           | <i>C. microcephalus</i> | 0.034195739          | 0.046657988            | 0.024918047          |                         |                    |
|           | <i>T. barbatus</i>      | 0.037594527          | 0.052545404            | 0.039143047          | 0.044797533             |                    |
| ND2       | <i>A. flavimanus</i>    |                      |                        |                      |                         |                    |
|           | <i>A. stigmatonhus</i>  | 0.086301242          |                        |                      |                         |                    |
|           | <i>F. gymnauchen</i>    | 0.149257814          | 0.177782857            |                      |                         |                    |
|           | <i>C. microcephalus</i> | 0.151264618          | 0.175352229            | 0.084774699          |                         |                    |
|           | <i>T. barbatus</i>      | 0.197704054          | 0.201940766            | 0.102867049          | 0.120892388             |                    |
| ND3       | <i>A. flavimanus</i>    |                      |                        |                      |                         |                    |
|           | <i>A. stigmatonhus</i>  | 0.082872491          |                        |                      |                         |                    |
|           | <i>F. gymnauchen</i>    | 0.035515687          | 0.069570894            |                      |                         |                    |
|           | <i>C. microcephalus</i> | 0.080790481          | 0.069202102            | 0.058870527          |                         |                    |
|           | <i>T. barbatus</i>      | 0.0846185            | 0.047938153            | 0.072536516          | 0.046622086             |                    |
| ND4       | <i>A. flavimanus</i>    |                      |                        |                      |                         |                    |
|           | <i>A. stigmatonhus</i>  | 0.115234827          |                        |                      |                         |                    |
|           | <i>F. gymnauchen</i>    | 0.085850961          | 0.112414142            |                      |                         |                    |

|      |                         |             |             |             |             |
|------|-------------------------|-------------|-------------|-------------|-------------|
|      | <i>C. microcephalus</i> | 0.0681671   | 0.104809453 | 0.068683408 |             |
|      | <i>T. barbatus</i>      | 0.062161757 | 0.096923822 | 0.097492652 | 0.085264998 |
|      | <i>A. flavimanus</i>    |             |             |             |             |
|      | <i>A. stigmatonous</i>  | 0.071899326 |             |             |             |
| ND4L | <i>F. gymnauchen</i>    | 0.076412678 | 0.078452457 |             |             |
|      | <i>C. microcephalus</i> | 0.056133214 | 0.096154826 | 0.031457905 |             |
|      | <i>T. barbatus</i>      | 0.037656989 | 0.088976004 | 0.064726868 | 0.035591003 |
|      | <i>A. flavimanus</i>    |             |             |             |             |
|      | <i>A. stigmatonous</i>  | 0.088664862 |             |             |             |
| ND5  | <i>F. gymnauchen</i>    | 0.06846615  | 0.032898989 |             |             |
|      | <i>C. microcephalus</i> | 0.100725623 | 0.070356146 | 0.035286455 |             |
|      | <i>T. barbatus</i>      | 0.068167988 | 0.027858752 | 0.056156758 | 0.699094587 |
|      | <i>A. flavimanus</i>    |             |             |             |             |
|      | <i>A. stigmatonous</i>  | 0.055874729 |             |             |             |
| ND6  | <i>F. gymnauchen</i>    | 0.122100109 | 0.19712097  |             |             |
|      | <i>C. microcephalus</i> | 0.156756248 | 0.127864651 | 0.028988908 |             |
|      | <i>T. barbatus</i>      | 0.15253861  | 0.083960605 | 0.150764474 | 0.122057646 |
|      | <i>A. flavimanus</i>    |             |             |             |             |
|      | <i>A. stigmatonous</i>  | 0.058582787 |             |             |             |
| ATP6 | <i>F. gymnauchen</i>    | 0.141045084 | 0.130554994 |             |             |
|      | <i>C. microcephalus</i> | 0.090274589 | 0.113409247 | 0.094115449 |             |
|      | <i>T. barbatus</i>      | 0.103288785 | 0.133848575 | 0.079987528 | 0.089622561 |
|      | <i>A. flavimanus</i>    |             |             |             |             |
|      | <i>A. stigmatonous</i>  | 0.08179913  |             |             |             |
| ATP8 | <i>F. gymnauchen</i>    | 0.06769897  | 0.187353176 |             |             |
|      | <i>C. microcephalus</i> | 0.239273268 | 0.467495858 | 0.173938038 |             |
|      | <i>T. barbatus</i>      | 0.02157578  | 0.224273504 | 0.174205541 | 0.200117202 |

Table S3. Data source of the 26 Gobiidae fishes studied in this study.

| Family        | Genus                  | Species                              | Source        |
|---------------|------------------------|--------------------------------------|---------------|
| Gobiidae      | <i>Acanthogobius</i>   | <i>Acanthogobius flavimanus</i>      | in this study |
|               |                        | <i>Acanthogobius flavimanus</i>      | NC_063711     |
|               |                        | <i>Acanthogobius stigmethonius</i>   | in this study |
|               |                        | <i>Acanthogobius stigmethonius</i>   | MT258987      |
|               |                        | <i>Acanthogobius ommaturus</i>       | JX186192      |
|               | <i>Ctenotrypauchen</i> | <i>Ctenotrypauchen microcephalus</i> | in this study |
|               |                        | <i>Ctenotrypauchen microcephalus</i> | MK541897.1    |
|               |                        | <i>Ctenotrypauchen chinensis</i>     | NC_058265     |
|               | <i>Odontamblyopus</i>  | <i>Odontamblyopus rebecca</i>        | NC_030481     |
|               |                        | <i>Odontamblyopus</i> sp.            | KT633954      |
|               | <i>Favonigobius</i>    | <i>Favonigobius gymnauchen</i>       | in this study |
|               |                        | <i>Favonigobius gymnauchen</i>       | NC_047227     |
|               |                        | <i>Favonigobius reichei</i>          | MN617828      |
|               | <i>Tridentiger</i>     | <i>Tridentiger barbatus</i>          | in this study |
|               |                        | <i>Tridentiger barbatus</i>          | NC_018823     |
|               |                        | <i>Tridentiger bifasciatus</i>       | JN244650      |
|               |                        | <i>Myersina filifer</i>              | NC_063546     |
|               | <i>Mugilogobius</i>    | <i>Cryptocentrus cinctus</i>         | MT199211      |
|               |                        | <i>Mugilogobius chulae</i>           | NC_026519     |
|               |                        | <i>Mugilogobius myxodermus</i>       | NC_036070     |
|               |                        | <i>Mugilogobius abei</i>             | NC_023353     |
|               |                        | <i>Rhinogobius</i>                   |               |
|               | <i>Rhinogobius</i>     | <i>Rhinogobius leavelli</i>          | NC_044964     |
|               |                        | <i>Rhinogobius giurinus</i>          | NC_022692     |
|               |                        | <i>Rhinogobius estrellae</i>         | LC648296      |
|               |                        | <i>Rhinogobius similis</i>           | LC648304      |
| Trichonotidae | <i>Trichonotus</i>     | <i>Trichonotus setiger</i>           | NC_034345     |
| Apogonidae    | <i>Ostorhinchus</i>    | <i>Ostorhinchus fleurieu</i>         | NC_056170     |
|               | <i>Jaydia</i>          | <i>Jaydia carinatus</i>              | NC_060473     |
|               | <i>Sphaeramia</i>      | <i>Sphaeramia orbicularis</i>        | AP018927      |
| Isuridae      | <i>Carcharodon</i>     | <i>Carcharodon carcharias</i>        | KX389266      |
| Ranidae       | <i>Glandirana</i>      | <i>Glandirana rugosa</i>             | LC536284      |

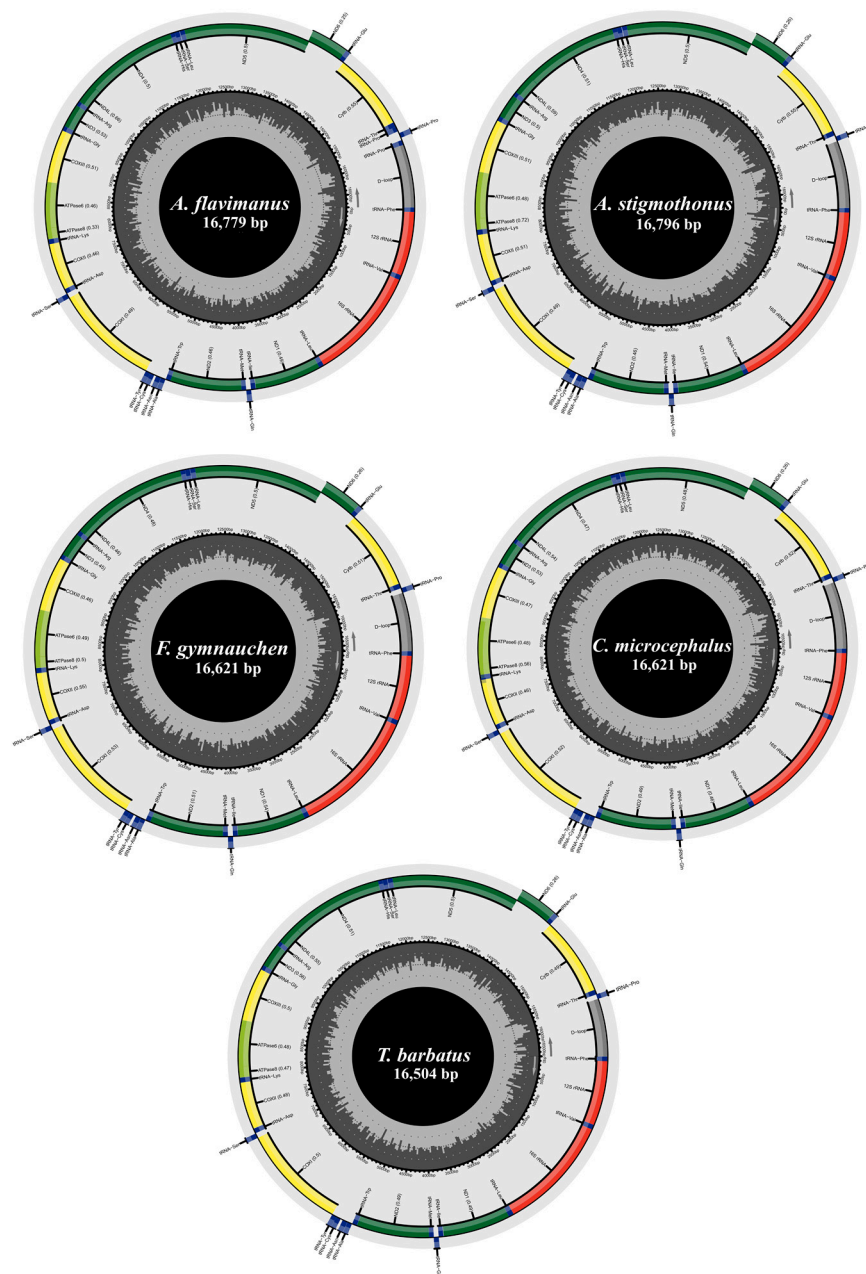

Figure S1. The structure circle diagram of 5 mitochondrial genomes.
